# Supplementary material
Source: Springer Nature journal article supplement (https://www.springermedizin.de/resource/supplementary/12889_2008_1221_MOESM3_ESM.pdf/9502720)

Events/1,000 patients/year

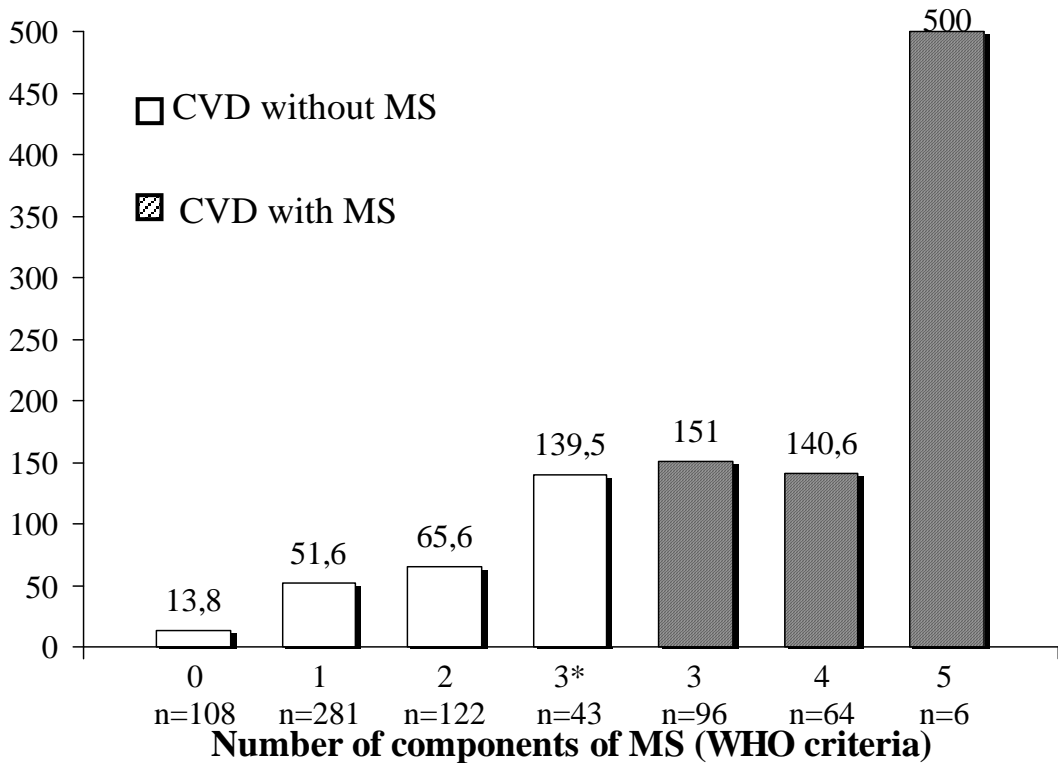

Supplement: MOESM3 [file 9502720]
